# Supplementary material
Source: Springer Nature journal article supplement (https://www.springermedizin.de/resource/supplementary/13033_2013_170_MOESM5_ESM.pdf/9652034)

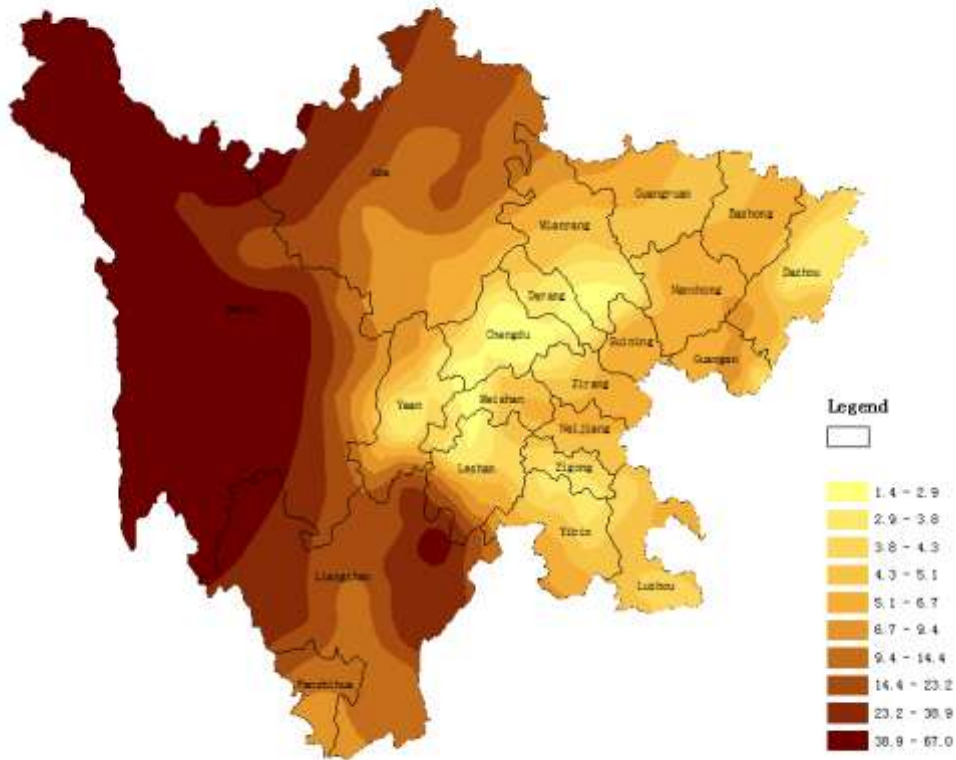

Supplement: MOESM5 [file 9652034]
